# Supplementary material for: Developing Grammaticality Judgment Task for Measuring Grammatical knowledge of Cleft Constructions of Pakistani ESL Learners
Source: Research Square preprint supplement (doi:10.21203/rs.3.rs-7758504/v1), 2025-11-05
Supplement: Supplementary file 1 [file 0d89841b092645d56a9d2929.docx]

**Grammaticality Judgment Task (GJT)**

**Demographic Information**

This section is about your profile and your experience with English language learning. In this section, there are multiple-choice and short questions. Please respond to the multiple-choice questions by selecting the appropriate option. For a short question, please write a short answer in the given space. If a question does not apply to you, write Not Applicable.

Remember that you are Completely Anonymous, and your identity will not be revealed at all when reporting the findings of the study.

- What is your age? _______________________________
- Gender:
- Male
- Female
- What is your first language? __________________
- Apart from Urdu and English, do you speak other languages?
- Yes
- No
- If YES, What other languages do you speak? Please specify ______________

What is your Education level?

- Bachelor
- Master
- M. Phil
- Other

Name of University____________________

How old were you when you started learning English? ________________

Where did you begin to receive formal English at school?

- Kindergarte
- Primary school
- Secondary school
- Higher secondary school

What was the medium of instruction used in your school?

- English
- Urdu
- Other

Have you ever taken any standardized English proficiency test before?

- YES
- NO

If “YES”, please specify the name of the test and score obtained. If “No” then write Not Applicable____________

What is your dominant language at university/in your department?

- English
- Urdu

Do you use English outside the class?

- Yes
- No

How often do you use English outside the class?

- Always
- Often
- Sometimes
- Occasionally
- Never

*Thank you for Participating*

**GJT**

**Instructions:** Please read each sentence carefully and judge the NUMBERED sentences. Select the appropriate answer from the four options provided for each item. Put a tick (✔ ) in the appropriate box. If you are sure that the sentence is definitely ungrammatical and cannot be acceptable in English, select option1 “definitely unacceptable”, if you are unsure that the sentence is ungrammatical and can be acceptable or unacceptable in English, select option 2 “probably unacceptable”. If you think that the sentence is probably grammatical, select option number 3 “probably acceptable”. If you are sure that the sentence is grammatical and acceptable in English, tick option 4 “definitely acceptable.”

| **Sr. No** | **Sentences** | **1**  **definitely unacceptable** | **2**  **probably**  **unacceptable** | **3**  **probably acceptable** | **4**  **definitely acceptable** |
| --- | --- | --- | --- | --- | --- |
|  | It was milk that I forgot to buy for breakfast. |  |  |  |  |
|  | It was Einstein who discovered the Relativity Theory. |  |  |  |  |
|  | The doctor operate the patient carefully. |  |  |  |  |
|  | A vacation is what I really need. |  |  |  |  |
|  | What the lecturer said it was quite amusing. |  |  |  |  |
|  | Young children mostly feed cats with milk. |  |  |  |  |
|  | It is eggs contain a high level of blood cholesterol. |  |  |  |  |
|  | It is him who inspire me. |  |  |  |  |
|  | She passed her thesis defense before she got married. |  |  |  |  |
|  | What I got for Christmas is a new shirt. |  |  |  |  |
|  | The tickets are what they will be delivered tomorrow. |  |  |  |  |
|  | The project should be carry out carefully. |  |  |  |  |
|  | It was the writer who we met. |  |  |  |  |
|  | What I saw it is a man. |  |  |  |  |
|  | Let’s go somewhere you guys knows that’s good and cheap. |  |  |  |  |
|  | It was he who appeared an idiot. |  |  |  |  |
|  | It was the doctor who operated the patient. |  |  |  |  |
|  | He convinced his mother to bake a cake. |  |  |  |  |
|  | It was Tom came to help us. |  |  |  |  |
|  | It was the results of the exam that he was waiting for. |  |  |  |  |
|  | The train had leave by the time I got to the railway station. |  |  |  |  |
|  | What you heard was an explosion. |  |  |  |  |
|  | It was an idiot that he appeared. |  |  |  |  |
|  | The cheapest shirts are on sale in this shop. |  |  |  |  |
|  | It was lead singer Jeremy put the band together. |  |  |  |  |
|  | It was Economics that Tania studied at Lancaster University. |  |  |  |  |
|  | I have been teaching English to ESL learners for March 2010. |  |  |  |  |
|  | Peter was it who broke the vase. |  |  |  |  |
|  | What the police are arresting is thieves. |  |  |  |  |
|  | Martin has changed his mind about next weekend. |  |  |  |  |
|  | It was Leonardo Da Vinci who painted ‘The Last Supper’. |  |  |  |  |
|  | It was a woman who they met her. |  |  |  |  |
|  | The hunter had been killed by a wild lion. |  |  |  |  |
|  | The place was where we met it was quite busy. |  |  |  |  |
|  | The story on the front page is what is disputable. |  |  |  |  |
|  | I usually getsup quite late. |  |  |  |  |
|  | What people are going to be voting on is the economy. |  |  |  |  |
|  | It was the fridge that I put in the kitchen. |  |  |  |  |
|  | Ahmad buy his wife a ring for their anniversary yesterday. |  |  |  |  |
|  | It was my sweater Lily wore yesterday. |  |  |  |  |
|  | It was my mother who taught me to love. |  |  |  |  |
|  | The stains on the shirt were removed by the housekeeper. |  |  |  |  |
|  | Ali was it who bought his new car. |  |  |  |  |
|  | It is her who win the race. |  |  |  |  |
|  | Computer programs have provide a variety of helpful applications. |  |  |  |  |
|  | It was the government that increased taxes. |  |  |  |  |
|  | Doctor was it who operated the patient. |  |  |  |  |
|  | The box can be opened only with a special screwdriver. |  |  |  |  |
|  | It was the old castle that we visited it. |  |  |  |  |
|  | What I want is a Mercedes. |  |  |  |  |
|  | They were seated on a largely table. |  |  |  |  |
|  | It was the beach that we visited. |  |  |  |  |
|  | What is required are both talent and hard work. |  |  |  |  |
|  | The man is talking to his friend. |  |  |  |  |
|  | It was the book that I read. |  |  |  |  |
|  | It was honest that he observed. |  |  |  |  |
|  | The car was not complete ready. |  |  |  |  |
|  | It was Michael Jackson who popularized the moon-walk step. |  |  |  |  |
|  | It was the video “Thriller” broke all records. |  |  |  |  |
|  | I will sign the cheque before you leave. |  |  |  |  |
|  | It was the movie that we watched it. |  |  |  |  |
|  | It was test anxiety that kept me awake. |  |  |  |  |
|  | She opened a account at a local bank. |  |  |  |  |
|  | It is rain cancels parades. |  |  |  |  |
|  | It was the boys who started the fight. |  |  |  |  |
|  | She sings beautifully. |  |  |  |  |
|  | John was it who knocked at the door. |  |  |  |  |
|  | It was Ali who showed honesty. |  |  |  |  |
|  | He sailed on Pacific ocean. |  |  |  |  |
|  | The textbook is what you should be reading. |  |  |  |  |
|  | This property is what it is disputable. |  |  |  |  |
|  | The woman cleans the car. |  |  |  |  |
|  | The one who helps the poor is me. |  |  |  |  |
|  | It is hardworking student who pass finally. |  |  |  |  |
|  | It was Mary took her mother to a restaurant last night. |  |  |  |  |
|  | I will meet you at the library later. |  |  |  |  |
|  | It was the boy who start the fight. |  |  |  |  |
|  | Itis his mother is on the phone. |  |  |  |  |
|  | Where did you parked the car? |  |  |  |  |
|  | It was I who behaved awfully rude. |  |  |  |  |
|  | It was the chief guest who we invited him. |  |  |  |  |
|  | If I go to market, I will bring sweets for you. |  |  |  |  |
|  | It was the student who proved intelligent. |  |  |  |  |
|  | What I read it is a horror story. |  |  |  |  |
|  | I'm busy at the moment, I working on the computer. |  |  |  |  |
|  | It was intelligent that he proved. |  |  |  |  |
|  | What he did was held a blind audition for interested musicians. |  |  |  |  |
|  | We have gone to Ireland for the holidays last year. |  |  |  |  |
|  | It was the girl who I married. |  |  |  |  |
|  | What Mary did was took her mother to a restaurant last night |  |  |  |  |
|  | My friend knows the answer to the question. |  |  |  |  |
|  | The one who leaves this house it is me. |  |  |  |  |
|  | What the manager wrote in the report, it was highly appreciative. |  |  |  |  |
|  | My friend does not speaks French. |  |  |  |  |
|  | It was rude that he behaved. |  |  |  |  |
|  | It is him who motivates me. |  |  |  |  |
|  | I knewhim when we were at college together. |  |  |  |  |
|  | What the glass contains is milk. |  |  |  |  |
|  | It is the president who wins the election. |  |  |  |  |
|  | When I opened the door, the baby is sleeping quietly. |  |  |  |  |
|  | What I saw was a tiger. |  |  |  |  |
|  | It was a poor student who passed the civil service exam. |  |  |  |  |
|  | Here is my report I have finished it at last. |  |  |  |  |
|  | What I watched was an action movie. |  |  |  |  |
|  | It was the umpire who started the match. |  |  |  |  |
|  | The stars shine at the sky. |  |  |  |  |
|  | What the principal wrote in the letter was a strong recommendation. |  |  |  |  |
