# Supplementary material for: Developing Grammaticality Judgment Task for Measuring Grammatical knowledge of Cleft Constructions of Pakistani ESL Learners
Source: Research Square preprint supplement (doi:10.21203/rs.3.rs-7758504/v1), 2025-11-05
Supplement: Supplementary file 3 [file 91913fa5b72b81eb423cf92e.docx]

**Item Facility (IF) of GJT**

| **Item No** | **Average level of Facility** | **Level of Difficulty** |
| --- | --- | --- |
| 1 | 0.7 | Medium |
| 2 | 0.8 | Medium |
| 3 | 0.6 | Medium |
| 4 | 0.7 | Medium |
| 5 | 0.8 | Medium |
| 6 | 0.7 | Medium |
| 7 | 0.8 | Medium |
| 8 | 0.8 | Medium |
| 9 | 0.6 | Medium |
| 10 | 0.8 | Medium |
| 11 | 0.6 | Medium |
| 12 | 0.7 | Medium |
| 13 | 0.8 | Medium |
| 14 | 0.7 | Medium |
| 15 | 0.8 | Medium |
| 16 | 0.7 | Medium |
| 17 | 0.8 | Medium |
| 18 | 0.8 | Medium |
| 19 | 0.8 | Medium |
| 20 | 0.8 | Medium |
| 21 | 0.8 | Medium |
| 22 | 0.8 | Medium |
| 23 | 0.8 | Medium |
| 24 | 0.6 | Medium |
| 25 | 0.6 | Medium |
| 26 | 0.7 | Medium |
| 27 | 0.6 | Medium |
| 28 | 0.8 | Medium |
| 29 | 0.8 | Medium |
| 30 | 0.7 | Medium |
| 31 | 0.7 | Medium |
| 32 | 0.8 | Medium |
| 33 | 0.8 | Medium |
| 34 | 0.8 | Medium |
| 35 | 0.8 | Medium |
| 36 | 0.6 | Medium |
| 37 | 0.8 | Medium |
| 38 | 0.8 | Medium |
| 39 | 0.7 | Medium |
| 40 | 0.8 | Medium |
| 41 | 0.7 | Medium |
| 42 | 0.8 | Medium |
| 43 | 0.8 | Medium |
| 44 | 0.7 | Medium |
| 45 | 0.7 | Medium |
| 46 | 0.8 | Medium |
| 47 | 0.8 | Medium |
| 48 | 0.8 | Medium |
| 49 | 0.8 | Medium |
| 50 | 0.8 | Medium |
| 51 | 0.7 | Medium |
| 52 | 0.8 | Medium |
| 53 | 0.7 | Medium |
| 54 | 0.8 | Medium |
| 55 | 0.8 | Medium |
| 56 | 0.7 | Medium |
| 57 | 0.8 | Medium |
| 58 | 0.7 | Medium |
| 59 | 0.7 | Medium |
| 60 | 0.7 | Medium |
| 61 | 0.8 | Medium |
| 62 | 0.7 | Medium |
| 63 | 0.6 | Medium |
| 64 | 0.7 | Medium |
| 65 | 0.7 | Medium |
| 66 | 0.7 | Medium |
| 67 | 0.8 | Medium |
| 68 | 0.6 | Medium |
| 69 | 0.6 | Medium |
| 70 | 0.7 | Medium |
| 71 | 0.6 | Medium |
| 72 | 0.7 | Medium |
